# Supplementary material
Source: PubMed Central journal article supplement (PMC4793837)
Supplement: obea016359.ww1_default.pdf [file obea016359.ww1_default.pdf]

**Appendix: Supplementary tables [posted as supplied by author]**

**Table A** | Distribution of postpartum hemorrhage following 466,686 Swedish deliveries (1997-2009), in relation to maternal & delivery characteristics

| Maternal characteristics | N total | Postpartum hemorrhage |      |      |            |
|--------------------------|---------|-----------------------|------|------|------------|
|                          |         | N                     | %    | OR   | 95% CI     |
| Age at delivery          |         |                       |      |      |            |
| <20                      | 11174   | 419                   | 3.75 | 1.00 |            |
| 20-34                    | 396686  | 21567                 | 5.44 | 1.48 | 1.34, 1.63 |
| >35                      | 58826   | 4003                  | 6.80 | 1.87 | 1.69, 2.08 |
| Parity                   |         |                       |      |      |            |
| Primipara                | 208534  | 12653                 | 6.07 | 1.00 |            |
| Multipara                | 258152  | 13336                 | 5.17 | 0.84 | 0.82, 0.86 |
| Civil status             |         |                       |      |      |            |
| Living with father       | 416182  | 23115                 | 5.55 | 1.00 |            |
| Living alone             | 10720   | 509                   | 4.75 | 0.85 | 0.77, 0.93 |
| Unknown                  | 13573   | 657                   | 4.84 | 0.86 | 0.80, 0.94 |
| Country of origin        |         |                       |      |      |            |
| Scandinavian             | 433322  | 24235                 | 5.59 | 1.00 |            |
| Non-Scandinavian         | 33222   | 1751                  | 5.27 | 0.94 | 0.89, 0.99 |
| Highest education        |         |                       |      |      |            |
| 9yrs compulsory          | 41532   | 1886                  | 4.54 | 1.00 |            |
| Upper secondary, <3yrs   | 73530   | 3829                  | 5.21 | 1.15 | 1.09, 1.22 |
| Upper secondary, 3yrs    | 132508  | 7297                  | 5.51 | 1.23 | 1.16, 1.29 |
| University               | 217602  | 12919                 | 5.94 | 1.33 | 1.26, 1.40 |
| Smoking in 1st trimester |         |                       |      |      |            |
| Non-smoker               | 394332  | 22201                 | 5.63 | 1.00 |            |
| Smoker                   | 44715   | 1983                  | 4.43 | 0.78 | 0.74, 0.82 |
| Height                   |         |                       |      |      |            |
| <160                     | 45745   | 2154                  | 4.71 | 1.00 |            |
| 160-169                  | 240520  | 12777                 | 5.31 | 1.14 | 1.08, 1.19 |
| >=170                    | 149740  | 9098                  | 6.08 | 1.31 | 1.25, 1.38 |
| Pre-pregnancy BMI        |         |                       |      |      |            |
| <20                      | 43860   | 2003                  | 4.57 | 1.00 |            |
| 20-24                    | 230881  | 12503                 | 5.42 | 1.20 | 1.14, 1.26 |
| >=25                     | 134787  | 8081                  | 6    | 1.33 | 1.27, 1.40 |
| Diabetes                 |         |                       |      |      |            |
| No                       | 463888  | 25747                 | 5.55 | 1.00 |            |
| Yes                      | 2798    | 242                   | 8.65 | 1.61 | 1.41, 1.84 |
| Chronic Hypertension     |         |                       |      |      |            |
| No                       | 464347  | 25808                 | 5.56 | 1.00 |            |
| Yes                      | 2339    | 181                   | 7.74 | 1.43 | 1.22, 1.67 |
| Coagulopathy             |         |                       |      |      |            |
| No                       | 464870  | 25829                 | 5.56 | 1.00 |            |
| Yes                      | 1816    | 160                   | 8.81 | 1.64 | 1.38, 1.95 |

| Maternal characteristics                  | N total | Postpartum hemorrhage |       |      |            |
|-------------------------------------------|---------|-----------------------|-------|------|------------|
|                                           |         | N                     | %     | OR   | 95% CI     |
| Fibroids                                  |         |                       |       |      |            |
| No                                        | 466354  | 25943                 | 5.56  | 1.00 |            |
| Yes                                       | 332     | 46                    | 13.86 | 2.73 | 1.95, 3.83 |
| Gestational Diabetes                      |         |                       |       |      |            |
| No                                        | 463630  | 25766                 | 5.56  | 1.00 |            |
| Yes                                       | 3056    | 223                   | 7.30  | 1.34 | 1.16, 1.54 |
| Preeclampsia                              |         |                       |       |      |            |
| No                                        | 453289  | 24861                 | 5.48  | 1.00 |            |
| Yes                                       | 13397   | 1128                  | 8.42  | 1.58 | 1.49, 1.69 |
| Chorioamnionitis                          |         |                       |       |      |            |
| No                                        | 465862  | 25933                 | 5.57  | 1.00 |            |
| Yes                                       | 824     | 56                    | 6.80  | 1.24 | 0.94, 1.62 |
| Placenta previa/accreta                   |         |                       |       |      |            |
| No                                        | 465298  | 25601                 | 5.50  | 1.00 |            |
| Yes                                       | 1388    | 388                   | 27.95 | 6.66 | 5.92, 7.50 |
| Abruptio placenta                         |         |                       |       |      |            |
| No                                        | 464972  | 25747                 | 5.54  | 1.00 |            |
| Yes                                       | 1714    | 242                   | 14.12 | 2.80 | 2.45, 3.22 |
| <b>Delivery/offspring characteristics</b> |         |                       |       |      |            |
| Birth year                                |         |                       |       |      |            |
| 1997-2000                                 | 125323  | 6069                  | 4.84  | 1.00 |            |
| 2001-2004                                 | 169957  | 9580                  | 5.64  | 1.17 | 1.14, 1.21 |
| 2005-2009                                 | 171406  | 10340                 | 6.03  | 1.26 | 1.22, 1.30 |
| Induction                                 |         |                       |       |      |            |
| No                                        | 412476  | 21808                 | 5.29  | 1.00 |            |
| Yes                                       | 54210   | 4181                  | 7.71  | 1.50 | 1.45, 1.55 |
| Weak/prolonged labor                      |         |                       |       |      |            |
| No                                        | 392020  | 19799                 | 5.05  | 1.00 |            |
| Yes                                       | 74666   | 6190                  | 8.29  | 1.70 | 1.65, 1.75 |
| Cesarean delivery                         |         |                       |       |      |            |
| No                                        | 399025  | 19671                 | 4.93  | 1.00 |            |
| Yes                                       | 67661   | 6318                  | 9.34  | 1.99 | 1.93, 2.05 |
| Offspring sex                             |         |                       |       |      |            |
| Male                                      | 240255  | 13047                 | 5.43  | 1.00 |            |
| Female                                    | 226431  | 12942                 | 5.72  | 1.06 | 1.03, 1.08 |
| Multiples                                 |         |                       |       |      |            |
| Single birth                              | 461758  | 25247                 | 5.47  | 1.00 |            |
| Multiples                                 | 4928    | 742                   | 15.06 | 3.06 | 2.83, 3.32 |
| Postterm                                  |         |                       |       |      |            |
| No                                        | 441178  | 23739                 | 5.38  | 1.00 |            |
| Yes                                       | 25149   | 2233                  | 8.88  | 1.71 | 1.64, 1.79 |
| High birth weight (=>4000g)               |         |                       |       |      |            |
| No                                        | 370216  | 17808                 | 4.81  | 1.00 |            |
| Yes                                       | 95080   | 8133                  | 8.55  | 1.85 | 1.80, 1.90 |

**TABLE B** | Clustering of postpartum hemorrhage; tetrachoric correlations

| Cluster-level        | All deliveries |      |              |
|----------------------|----------------|------|--------------|
|                      | N              | TCC  | 95% CI       |
| Couples              | 183,170        | 0.32 | (0.30, 0.33) |
| Mothers, new partner | 26,646         | 0.26 | (0.21, 0.30) |
| Fathers, new partner | 23,527         | 0.02 | (-.03, 0.08) |
| Sisters              | 97,228         | 0.10 | (0.08, 0.13) |
| Brothers             | 91,168         | 0.04 | (0.02, 0.07) |
| Mixed siblings       | 177,944        | 0.01 | (-.01, 0.03) |

NOTE: N is number of pair-wise correlations in the cluster

**TABLE C** | Clustering of postpartum hemorrhage following vaginal delivery; Pair-wise odds ratios with univariable adjustment for potentially shared risk factors

| Explanatory Covariate | Pair-wise odds ratio for PPH in vaginal deliveries only |                   |                   |                   |                   |                   |                   |
|-----------------------|---------------------------------------------------------|-------------------|-------------------|-------------------|-------------------|-------------------|-------------------|
|                       |                                                         | Couple            | Mother new p      | Father new p      | Sisters           | Brothers          | Mixed             |
| All                   | N                                                       | 116,552           | 21,090            | 16,236            | 63,352            | 57,332            | 112,420           |
|                       | Crude                                                   | 4.54 (4.20, 4.91) | 3.64 (2.93, 4.51) | 0.97 (0.69, 1.37) | 1.58 (1.34, 1.87) | 1.27 (1.05, 1.53) | 1.03 (0.89, 1.19) |
| Mother's age          |                                                         | 4.64 (4.29, 5.02) | 3.64 (2.93, 4.51) | 0.97 (0.69, 1.37) | 1.58 (1.34, 1.87) | 1.26 (1.05, 1.53) | 1.03 (0.89, 1.19) |
| Birth year            |                                                         | 4.52 (4.18, 4.89) | 3.62 (2.92, 4.50) | 0.96 (0.68, 1.36) | 1.58 (1.33, 1.87) | 1.27 (1.05, 1.53) | 1.03 (0.89, 1.19) |
| Parity                |                                                         | 4.52 (4.18, 4.89) | 3.64 (2.94, 4.52) | 1.00 (0.71, 1.40) | 1.58 (1.34, 1.87) | 1.27 (1.05, 1.53) | 1.03 (0.89, 1.19) |
| IP-interval           |                                                         | 4.63 (4.28, 5.01) | 3.65 (2.94, 4.52) | 0.98 (0.70, 1.38) | 1.59 (1.34, 1.87) | 1.26 (1.05, 1.53) | 1.03 (0.89, 1.19) |
| Height                | N                                                       | 92,434            | 18,446            | 14,000            | 50,360            | 45,544            | 88,964            |
|                       | Crude                                                   | 4.72 (4.32, 5.16) | 3.30 (2.59, 4.20) | 1.02 (0.71, 1.47) | 1.54 (1.27, 1.87) | 1.19 (0.95, 1.50) | 1.05 (0.89, 1.24) |
|                       | Adjusted                                                | 4.68 (4.28, 5.11) | 3.28 (2.57, 4.17) | 1.01 (0.70, 1.46) | 1.51 (1.24, 1.84) | 1.19 (0.95, 1.49) | 1.04 (0.88, 1.23) |
| BMI                   | N                                                       | 74,208            | 16,223            | 12,245            | 40,604            | 36,524            | 71,288            |
|                       | Crude                                                   | 4.75 (4.30, 5.25) | 3.16 (2.44, 4.10) | 0.98 (0.66, 1.45) | 1.58 (1.27, 1.95) | 1.19 (0.92, 1.55) | 1.04 (0.87, 1.26) |
|                       | Adjusted                                                | 4.74 (4.29, 5.23) | 3.16 (2.45, 4.10) | 0.97 (0.65, 1.44) | 1.57 (1.27, 1.95) | 1.19 (0.92, 1.55) | 1.04 (0.87, 1.26) |
| Education             | N                                                       | 116,116           | 21,023            | 15,780            | 63,252            | 57,000            | 111,980           |
|                       | Crude                                                   | 4.54 (4.20, 4.91) | 3.64 (2.94, 4.52) | 0.97 (0.68, 1.37) | 1.57 (1.32, 1.85) | 1.28 (1.06, 1.54) | 1.03 (0.89, 1.19) |
|                       | Adjusted                                                | 4.53 (4.19, 4.89) | 3.64 (2.94, 4.52) | 0.96 (0.67, 1.36) | 1.57 (1.33, 1.86) | 1.28 (1.06, 1.54) | 1.03 (0.89, 1.19) |
| Smoking               | N                                                       | 93,470            | 18,963            | 14,459            | 50,880            | 45,740            | 90,320            |
|                       | Crude                                                   | 4.59 (4.20, 5.01) | 3.43 (2.71, 4.33) | 1.03 (0.72, 1.48) | 1.54 (1.28, 1.87) | 1.22 (0.97, 1.52) | 1.03 (0.87, 1.21) |
|                       | Adjusted                                                | 4.56 (4.18, 4.99) | 3.43 (2.71, 4.33) | 1.03 (0.72, 1.48) | 1.54 (1.27, 1.86) | 1.21 (0.97, 1.52) | 1.03 (0.87, 1.21) |

| Explanatory Covariate | Pair-wise odds ratio for PPH in vaginal deliveries only |                   |                   |                   |                   |                   |                   |
|-----------------------|---------------------------------------------------------|-------------------|-------------------|-------------------|-------------------|-------------------|-------------------|
|                       |                                                         | Couple            | Mother new p      | Father new p      | Sisters           | Brothers          | Mixed             |
| All                   | N                                                       | 116,552           | 21,090            | 16,236            | 63,352            | 57,332            | 112,420           |
|                       | Crude                                                   | 4.54 (4.20, 4.91) | 3.64 (2.93, 4.51) | 0.97 (0.69, 1.37) | 1.58 (1.34, 1.87) | 1.27 (1.05, 1.53) | 1.03 (0.89, 1.19) |
| DM                    |                                                         | 4.54 (4.20, 4.91) | 3.64 (2.93, 4.51) | 0.97 (0.69, 1.37) | 1.58 (1.34, 1.87) | 1.27 (1.05, 1.54) | 1.03 (0.89, 1.19) |
| HT                    |                                                         | 4.54 (4.20, 4.91) | 3.63 (2.92, 4.50) | 0.98 (0.69, 1.37) | 1.59 (1.34, 1.88) | 1.27 (1.05, 1.53) | 1.03 (0.89, 1.19) |
| Coagulopathy          |                                                         | 4.54 (4.20, 4.91) | 3.63 (2.93, 4.51) | 0.97 (0.69, 1.37) | 1.58 (1.34, 1.87) | 1.27 (1.05, 1.53) | 1.03 (0.89, 1.19) |
| Fibroids              |                                                         | 4.54 (4.20, 4.91) | 3.63 (2.92, 4.50) | 0.97 (0.69, 1.37) | 1.58 (1.34, 1.87) | 1.27 (1.05, 1.53) | 1.03 (0.89, 1.19) |
| PE                    |                                                         | 4.56 (4.21, 4.93) | 3.60 (2.90, 4.48) | 0.97 (0.69, 1.37) | 1.59 (1.35, 1.88) | 1.27 (1.05, 1.53) | 1.03 (0.89, 1.20) |
| Chorioamnionitis      |                                                         | 4.55 (4.20, 4.91) | 3.63 (2.93, 4.51) | 0.98 (0.69, 1.37) | 1.58 (1.34, 1.87) | 1.27 (1.05, 1.53) | 1.03 (0.89, 1.19) |
| Induction             |                                                         | 4.42 (4.08, 4.78) | 3.51 (2.82, 4.36) | 0.97 (0.69, 1.37) | 1.58 (1.34, 1.87) | 1.28 (1.06, 1.54) | 1.03 (0.89, 1.19) |
| Labor complication    |                                                         | 4.55 (4.20, 4.92) | 3.60 (2.90, 4.48) | 0.97 (0.69, 1.37) | 1.57 (1.33, 1.86) | 1.27 (1.05, 1.53) | 1.03 (0.89, 1.20) |
| Sex                   |                                                         | 4.54 (4.20, 4.91) | 3.63 (2.92, 4.51) | 0.97 (0.69, 1.37) | 1.59 (1.34, 1.87) | 1.27 (1.06, 1.54) | 1.03 (0.89, 1.19) |
| Multiples             |                                                         | 4.53 (4.19, 4.90) | 3.64 (2.93, 4.52) | 0.97 (0.69, 1.37) | 1.59 (1.34, 1.88) | 1.27 (1.05, 1.53) | 1.03 (0.89, 1.19) |
| Postterm              | N                                                       | 116,342           | 21,034            | 16,177            | 63,240            | 57,224            | 112,220           |
|                       | Crude                                                   | 4.54 (4.20, 4.91) | 3.65 (2.94, 4.53) | 0.97 (0.69, 1.37) | 1.59 (1.34, 1.88) | 1.28 (1.06, 1.54) | 1.03 (0.89, 1.19) |
|                       | Adjusted                                                | 4.46 (4.12, 4.83) | 3.57 (2.87, 4.44) | 0.98 (0.69, 1.38) | 1.57 (1.33, 1.86) | 1.28 (1.06, 1.55) | 1.02 (0.88, 1.18) |
| High birth weight     | N                                                       | 115,388           | 20,972            | 16,149            | 62,716            | 56,800            | 111,260           |
|                       | Crude                                                   | 4.58 (4.23, 4.95) | 3.68 (2.97, 4.57) | 0.97 (0.69, 1.37) | 1.59 (1.34, 1.88) | 1.28 (1.06, 1.54) | 1.03 (0.89, 1.19) |
|                       | Adjusted                                                | 4.20 (3.88, 4.56) | 3.46 (2.77, 4.32) | 0.94 (0.67, 1.33) | 1.54 (1.30, 1.82) | 1.27 (1.05, 1.53) | 1.02 (0.88, 1.19) |

NOTE: Results from Alternating Logistic Regression; N is number of pair-wise correlations in the cluster

**TABLE D** | Clustering of postpartum hemorrhage; Pair-wise odds ratios

| Cluster-level        | All deliveries |       |            | All deliveries - complete case |       |            |      |            |      |            |  |
|----------------------|----------------|-------|------------|--------------------------------|-------|------------|------|------------|------|------------|--|
|                      | N              | Crude |            | N                              | Crude |            |      | M1         |      | M2         |  |
|                      |                | OR    | 95% CI     |                                | OR    | 95% CI     | OR   | 95% CI     | OR   | 95% CI     |  |
| Couples              | 183,170        | 3.58  | 3.38, 3.79 | 142,610                        | 3.66  | 3.43, 3.90 | 3.23 | 3.02, 3.46 | 3.01 | 2.80, 3.23 |  |
| Mothers, new partner | 26,646         | 2.97  | 2.49, 3.54 | 23,079                         | 2.83  | 2.33, 3.43 | 2.58 | 2.11, 3.15 | 2.55 | 2.08, 3.12 |  |
| Fathers, new partner | 23,527         | 1.06  | 0.84, 1.36 | 20,063                         | 1.17  | 0.90, 1.50 | 1.13 | 0.87, 1.47 | 1.12 | 0.86, 1.45 |  |
| Sisters              | 97,228         | 1.55  | 1.38, 1.73 | 75,828                         | 1.56  | 1.37, 1.78 | 1.48 | 1.30, 1.69 | 1.43 | 1.25, 1.63 |  |
| Brothers             | 91,168         | 1.20  | 1.06, 1.36 | 71,008                         | 1.16  | 1.00, 1.34 | 1.13 | 0.98, 1.31 | 1.12 | 0.97, 1.30 |  |
| Mixed siblings       | 177,944        | 1.03  | 0.94, 1.13 | 138,384                        | 1.05  | 0.94, 1.17 | 1.03 | 0.92, 1.15 | 1.03 | 0.93, 1.14 |  |

NOTE: Results from Alternating Logistic Regression; N is number of pair-wise correlations in the cluster

M1 includes birth year, maternal age, parity, inter-pregnancy interval, height, BMI, induction, labor complication, postterm birth and high birth weight

M2 is M1 adjusted also for Cesarean
